# Supplementary material
Source: PubMed Central journal article supplement (PMC470768)
Supplement: pnas_101_26_9885__1.pdf [file pnas_101_26_9885__1.pdf]

### Table 3. Germplasm list

#### Public Orange Inbreds

|               |                                        |
|---------------|----------------------------------------|
| 1033-A Catsul | Inbred from Uruguay                    |
| PI 186217     | Argentinian inbred line                |
| PI 270297     | 41:2504B Amargo Inbred Line; Argentina |

#### Public Yellow Inbreds

|             |                                                                                                                               |
|-------------|-------------------------------------------------------------------------------------------------------------------------------|
| 66A4-2      | Howe's Early Alberta, very early OP variety                                                                                   |
| Ames 12734  | Indian chief; Huffmann variety x Ill. Low ear                                                                                 |
| Ames 23427  | Reid Yellow Dent                                                                                                              |
| Ames 23476  | [(V3xWf9)S1 Wf9]                                                                                                              |
| Ames 24575  | Yellow pearl popcorn inbred                                                                                                   |
| B73         | Reid; Iowa Stiff Stalk Synthetic                                                                                              |
| H60         | Pride of Saline; Wooster Clarage; Lancaster; NSS                                                                              |
| Inbred Lo32 | Italian inbred                                                                                                                |
| Mo17        | Lancaster surecrop; Krug                                                                                                      |
| PI 221785   | South African inbred                                                                                                          |
| PI 221788   | South African inbred                                                                                                          |
| PI 340837   | Selection from Japanese Hulless white                                                                                         |
| PI 542777   | South American popcorn inbred                                                                                                 |
| PI 583350   | Guatemalan inbred                                                                                                             |
| PI 583351   | Brazilian inbred                                                                                                              |
| PI 583352   | Ecuador inbred                                                                                                                |
| PI 587132   | Unknown                                                                                                                       |
| PI 593015   | Hi34 inbred w/ Antigua 2D parentage                                                                                           |
| PI 595553   | Yellow flint materials from Mexico, Cuba, Dominican Republic, South America, St. Vincent, Guatemala, Surinam, and India       |
| PI 595554   | Materials from Mexico, Central America, Caribbean, Ecuador, Colombia, and Argentina                                           |
| PI 595559   | Tuxpeno, ETO Amarillo, Caribbean and Brazilian germplasm; downy mildew resistance incorporation from Thailand and Philippines |
| PI 595562   | Materials from Mexico, Cuba, Dominican Republic, Antigua, South America, India, Puerto Rico, and Central America.             |
| PI 595566   | CIMMYT Syn Amarillo TSR                                                                                                       |
| SC60        | Gourd seed; US southern dent                                                                                                  |

#### Private Yellow Inbreds

|     |                 |
|-----|-----------------|
| Y-1 | Southern US 3   |
| Y-2 | SSS B14 Derived |

|      |                              |
|------|------------------------------|
| Y-3  | Central cornbelt SSS/NSS Mix |
| Y-4  | Tropical 4                   |
| Y-5  | Early cornbelt public C0109  |
| Y-6  | Cornbelt NSS Mix             |
| Y-7  | Southern US 2                |
| Y-8  | European flint (F2)          |
| Y-9  | NSS Cornbelt IODENT/OH43     |
| Y-10 | Tropical 3                   |
| Y-11 | NSS Cornbelt                 |
| Y-12 | Tropical 1                   |
| Y-13 | Tropical 2                   |
| Y-14 | Southern US 1                |

Public White Inbreds

|            |                                                                                                                                                |
|------------|------------------------------------------------------------------------------------------------------------------------------------------------|
| Ames 22026 | Narrow Grain Evergreen white sweetcorn inbred                                                                                                  |
| Ames 22443 | Silver King; N.W. dent                                                                                                                         |
| Ames 22754 | Reid Yellow Dent                                                                                                                               |
| Ames 22758 | Neal paymaster; Snelling stiff stalk                                                                                                           |
| Ames 23418 | Black Mexican; Spanish gold; Purdue yellow dent                                                                                                |
| CIze 127   | Boone county white; White Mastodon; Tuxpan                                                                                                     |
| NC296      | Jamaican hybrid; Cuban flint; Tuxpeno (acquired from M.M. Goodman)                                                                             |
| PI 221733  | Potchefstroom Pearl                                                                                                                            |
| PI 221738  | Hickory King                                                                                                                                   |
| PI 340836  | Japanese hullless popcorn inbred                                                                                                               |
| PI 340838  | white rice popcorn inbred                                                                                                                      |
| PI 406108  | Lancaster surecrop                                                                                                                             |
| PI550442   | OP variety Laguna (USDA corn from Mexico)                                                                                                      |
| PI 550545  | inbred from Nepal                                                                                                                              |
| PI 561605  | Syn A1/87014 from Cameroon                                                                                                                     |
| PI 583846  | Mo17 white composite                                                                                                                           |
| PI 595531  | Tuxpeno germplasm from Mexico; also Central American and Columbian materials                                                                   |
| PI 595532  | Crosses among Mexican, Colombian, Caribbean, Central American, Indian, Thailand, and Philippine lines                                          |
| PI 595539  | Tuxpeno germplasm from Mexico; some Central American materials                                                                                 |
| PI 595546  | ~30% downy mildew resistance from Phillipines; also from Argentina, Colombia, Cuba, Ecuador, El Salvador, Honduras, India, Mexico, and the US. |
| PI 595547  | Tuxpeno, Cuban flints, and ETO (from Central and South America.Mexico,US)                                                                      |
| Stock 6    | Minnesota #13                                                                                                                                  |

Private White Inbreds

|     |                                                                                   |
|-----|-----------------------------------------------------------------------------------|
| W16 | Public MOSQA                                                                      |
| W17 | Public W94                                                                        |
| W2  | Public V63                                                                        |
| W20 | Public W94,V80                                                                    |
| W21 | Public KRUG K174-312-B1 ; white Mo17 (7 doses)                                    |
| W28 | Unknown                                                                           |
| W37 | HI 22 W                                                                           |
| W45 | PI 451693; derived from seven Cuzco populations and one early USA dent population |
| W50 | Illinois High Oil                                                                 |
| W6  | Public V63                                                                        |
| W7  | Southern Dent                                                                     |
| W8  | Public KY216                                                                      |
