# Supplementary material
Source: PubMed Central journal article supplement (PMC470768)
Supplement: pnas_101_26_9885__2.pdf [file pnas_101_26_9885__2.pdf]

**Table 4. Primers**

| <b>Primer Name</b> | <b>Primer sequence</b> | <b>Function</b>                 |
|--------------------|------------------------|---------------------------------|
| STKL               | TGATCTTGGAGGATCAGG     | Low copy amplification          |
| STKR               | GCAACCACTCCTCTTCG      | Low copy amplification          |
| PCO131338L         | AAGAGAAGGATGGATTGG     | Low copy amplification          |
| PCO131338R         | CCATCAGAAACACAACAGG    | Low copy amplification          |
| LCBE1L             | CAAAGATGGGCTGTCAGA     | Low copy amplification          |
| LCBE1R             | CTTTACCGTGGCCATAGA     | Low copy amplification          |
| MLOL               | CTACATCGTCAAGGTGTGC    | Low copy amplification          |
| MLOR               | GCAGCAGCATTTCATATCC    | Low copy amplification          |
| LCBE2L             | TTACAAGGAGGGAGCAAAG    | Low copy amplification          |
| LCBE2R             | ATCTGCCTCGACGAGTTC     | Low copy amplification          |
| LC1L               | AAGCAGAAACGTGAGAAGG    | Low copy amplification          |
| LC1R               | TTTGGGAGTTCACCTATCC    | Low copy amplification          |
| LCBE3L             | CGTGTGTATGCGAGAGC      | Low copy amplification          |
| LCBE3R             | GCACTTTGAGCCTTTGC      | Low copy amplification          |
| CycIII             | TAGAGCTGTTGGAGGAGACC   | Low copy amplification          |
| CycIIIR            | ACTGGAGCATCTCATATTCC   | Low copy amplification          |
| sbe1L              | CATCTCAAGGAATCTCACG    | Low copy amplification          |
| sbe1R              | GTAGCATGGGCAAATCG      | Low copy amplification          |
| Gap1L              | CCTTGC GCAATAACTACC    | Close gaps in assembly          |
| Gap1R              | CTAACTGATGCCATTGTGG    | Close gaps in assembly          |
| Gap2L              | TGAAGCCTCAAACCTGAACC   | Close gaps in assembly          |
| Gap2R              | CAATGGGACAATGAGTGG     | Close gaps in assembly          |
| Gap3L              | TGGTTAGGAGGTGAAGTCC    | Close gaps in assembly          |
| Gap3R              | TTGATCAGAGGGTGTATGC    | Close gaps in assembly          |
| Gap4L              | ATCTCGCAAATCCTGTCC     | Close gaps in assembly          |
| Gap4R              | TCTCGACTTAGATGGATT     | Close gaps in assembly          |
| Gap5L              | CCACACAAAGAATCAGAGC    | Close gaps in assembly          |
| Gap5R              | ATTGGAGCATCACTCACC     | Close gaps in assembly          |
| LRset1L            | ATGGCGTGTAACTCTGG      | Bridged intermediate to LRset1R |
|                    | ATCTGCCTCGACGAGTTC     | be108d.j4                       |
| LRset2L            | TTGTTTCAGGTGCTGTGC     | Bridged MLO to                  |
| LRset2R            | TTGGCTACTTCGACATCC     | intermediate                    |
| Y1-MLOconnectorL   | AACAAGGAATCCGTCAGC     | Bridged Y1 to MLO               |
| Y1-MLOconnectorR   | GCAGCAGCATTTCATATCC    |                                 |
