# Supplementary material
Source: PubMed Central journal article supplement (PMC470768)

$r^2$ 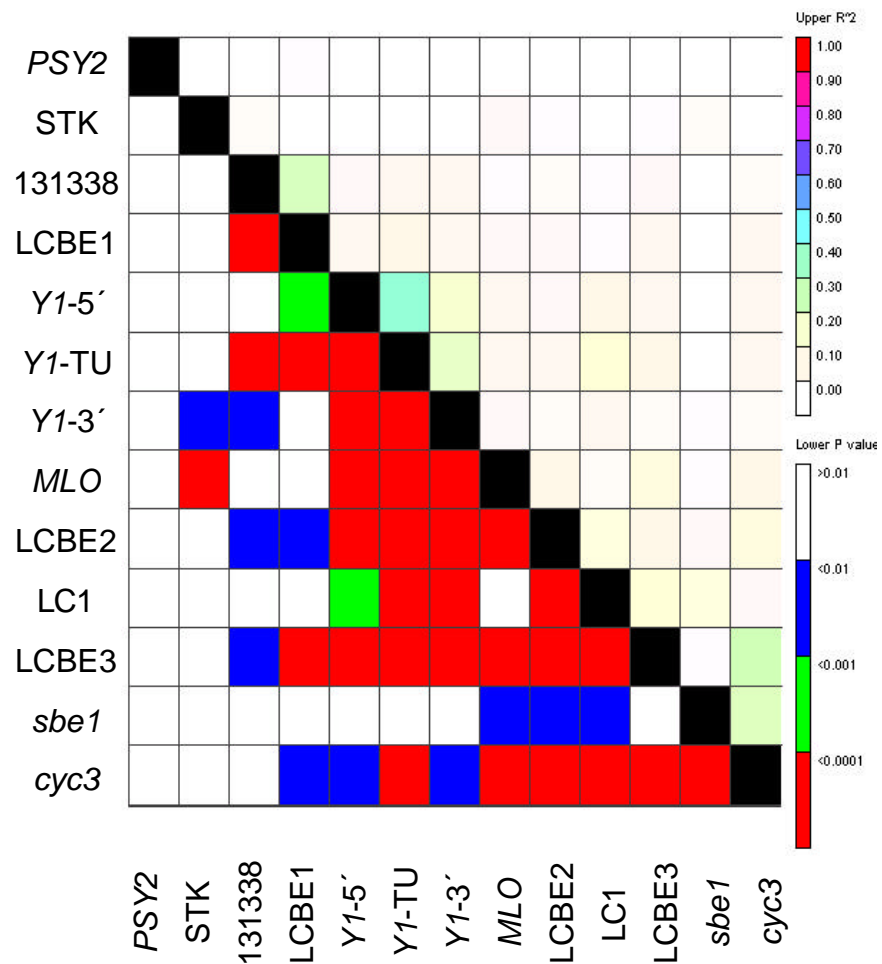

(a)

 $D'$ 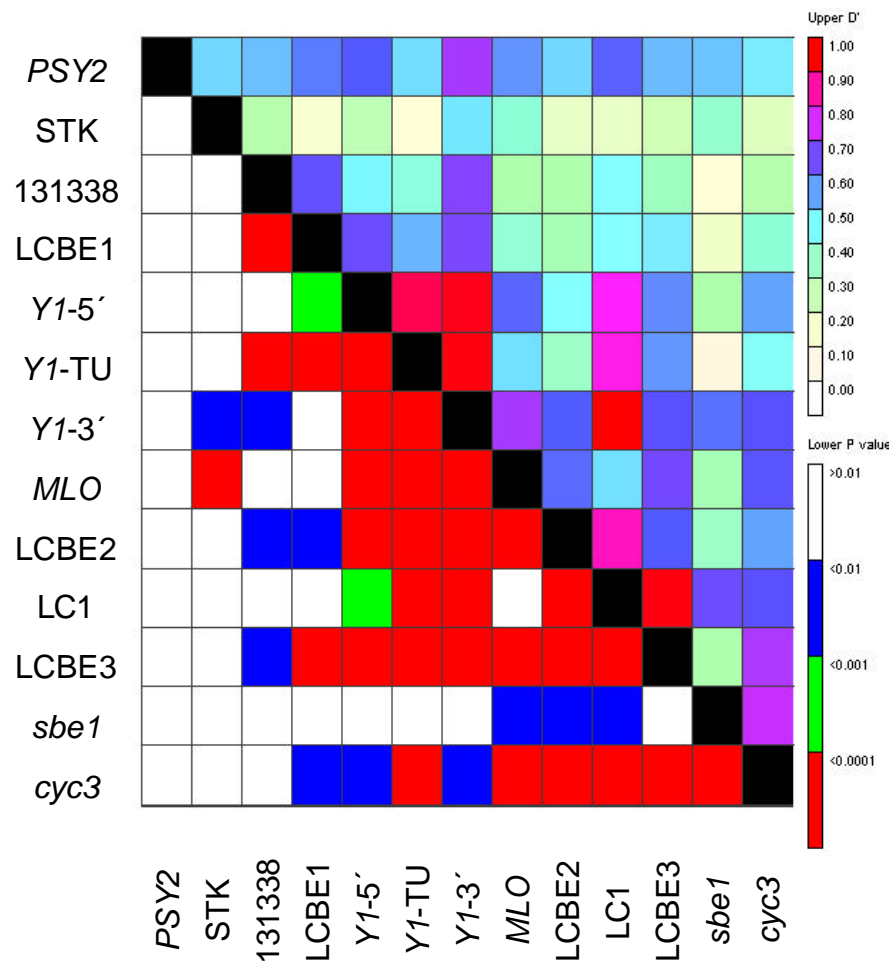

(b)

Supplement: pnas_101_26_9885__3.pdf [file pnas_101_26_9885__3.pdf]
